# Supplementary material
Source: PubMed Central journal article supplement (PMC5025333)

A

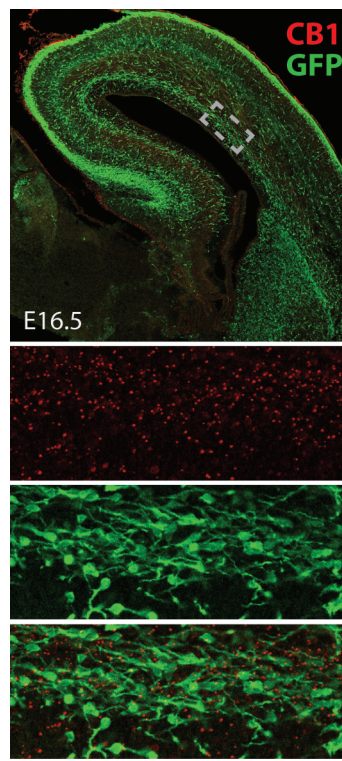

Supplement: NIHMS753664-supplement-2.pdf [file NIHMS753664-supplement-2.pdf]

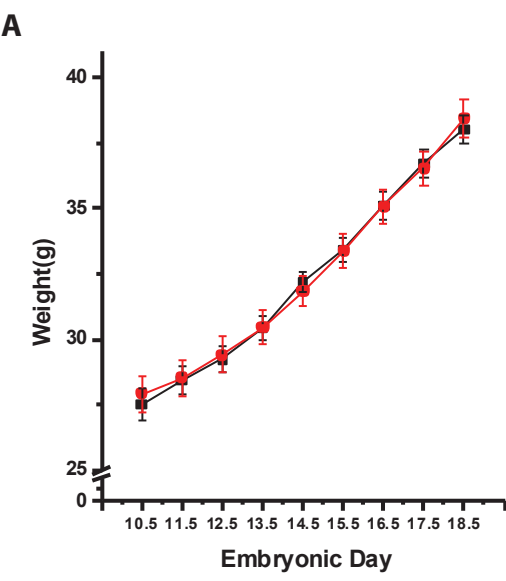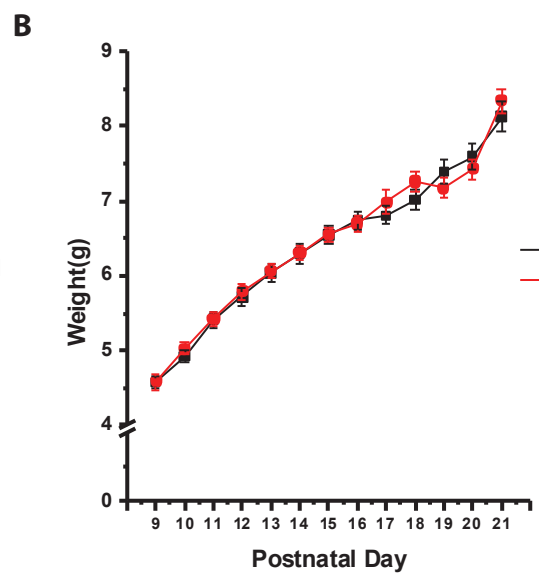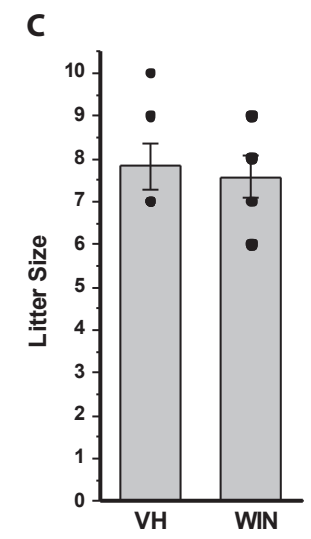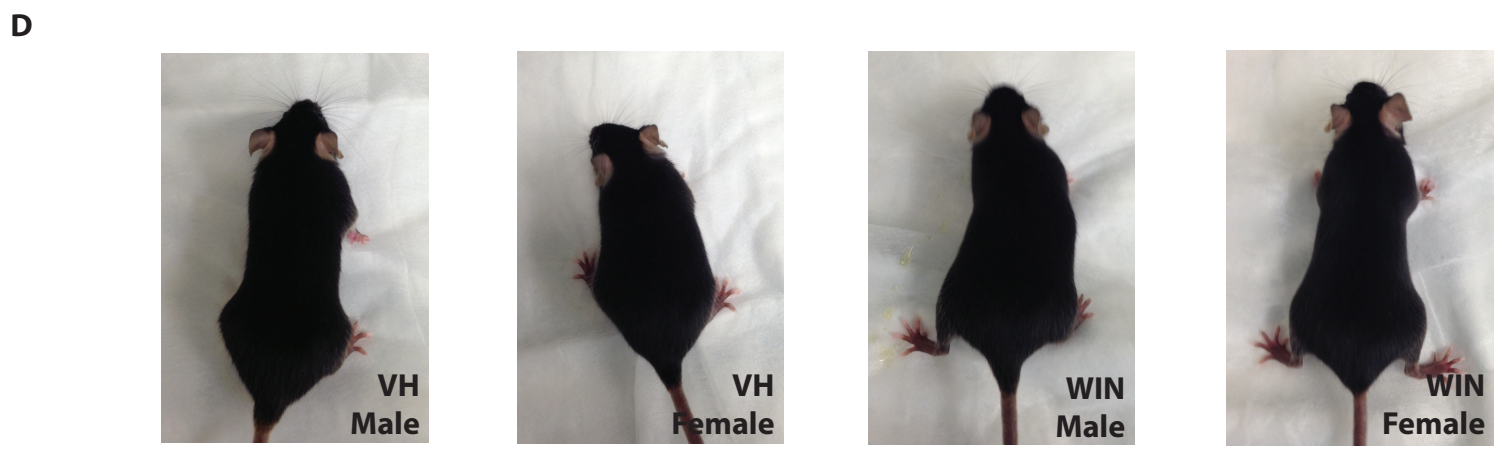

Supplement: NIHMS753664-supplement-3.pdf [file NIHMS753664-supplement-3.pdf]

**A**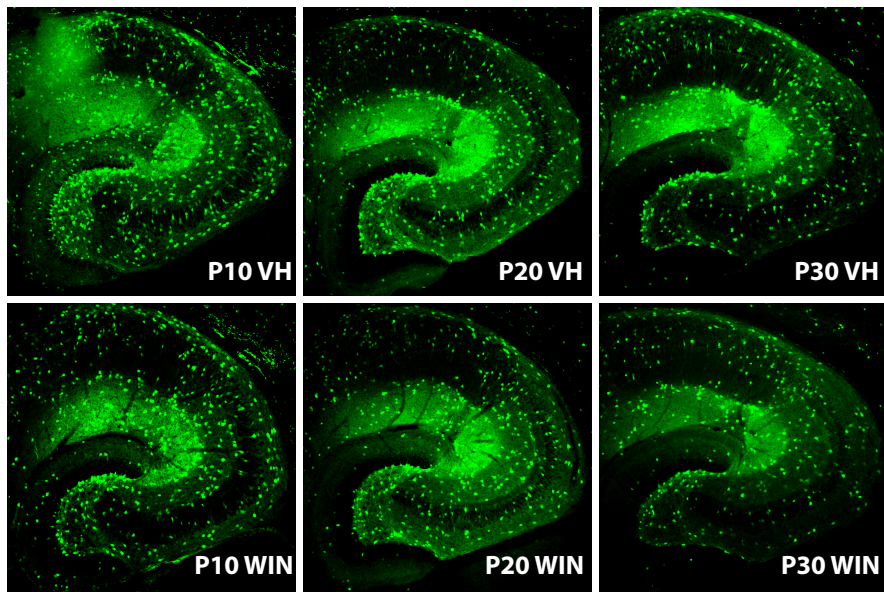**B**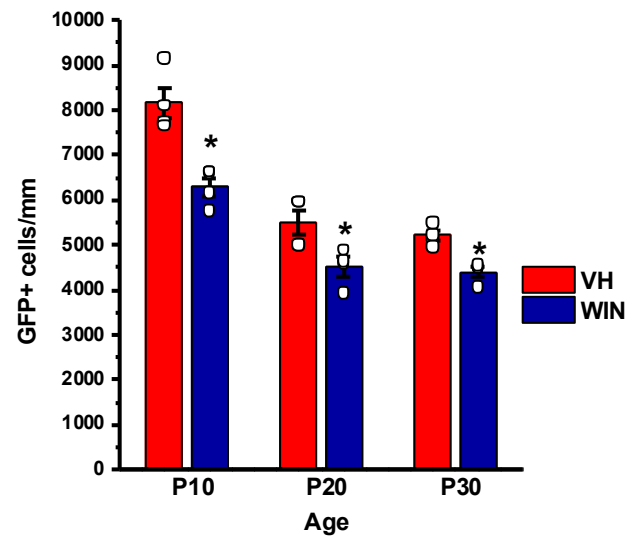

Supplement: NIHMS753664-supplement-4.pdf [file NIHMS753664-supplement-4.pdf]

**A**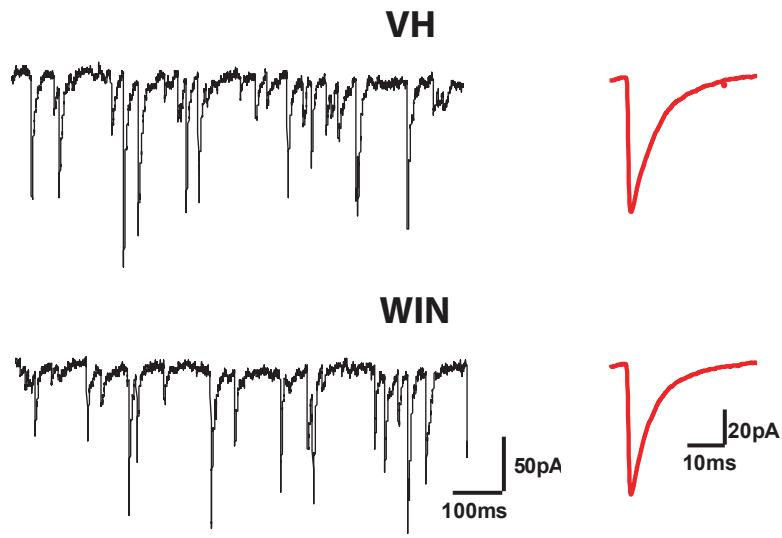**B**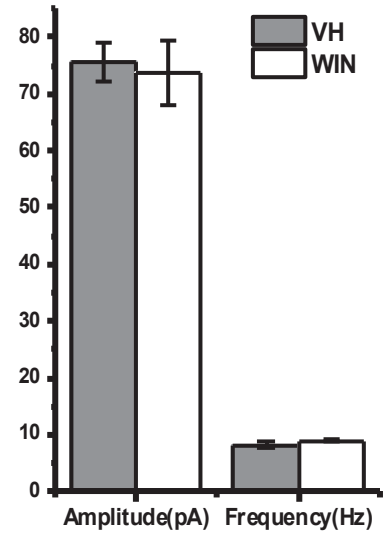

Supplement: NIHMS753664-supplement-5.pdf [file NIHMS753664-supplement-5.pdf]

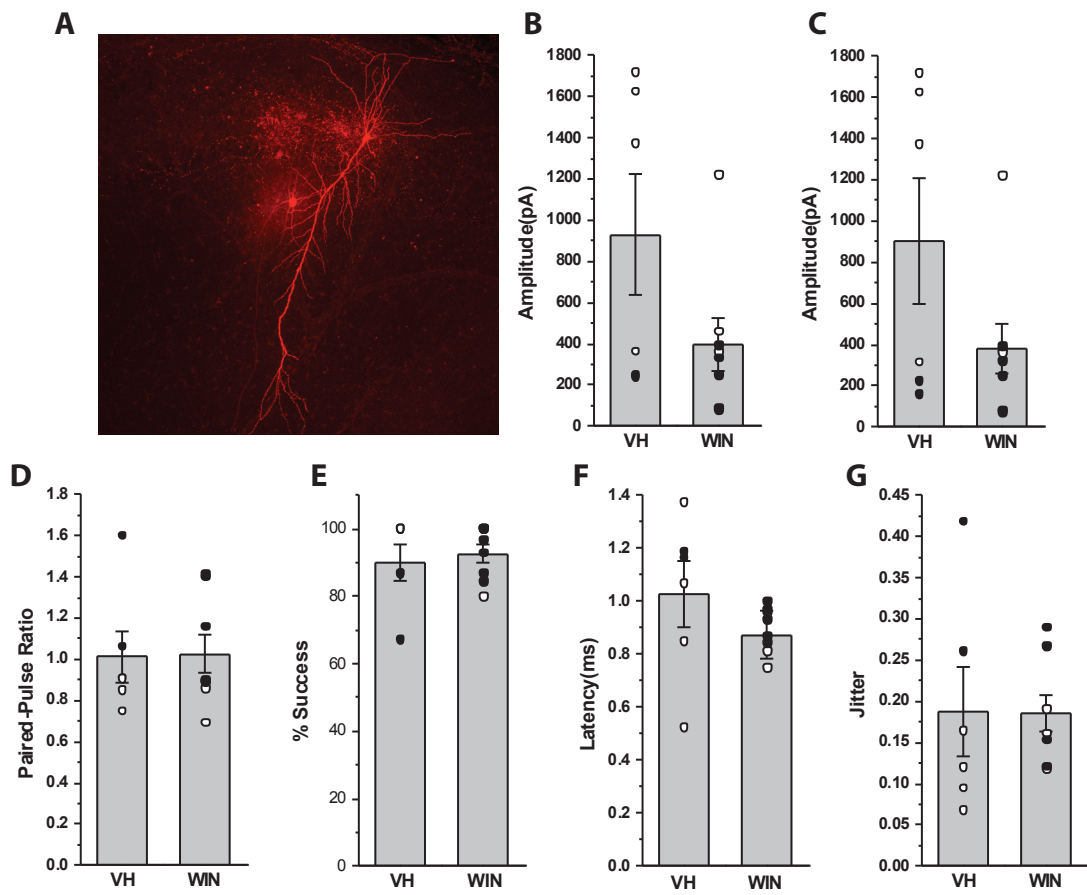

Supplement: NIHMS753664-supplement-6.pdf [file NIHMS753664-supplement-6.pdf]

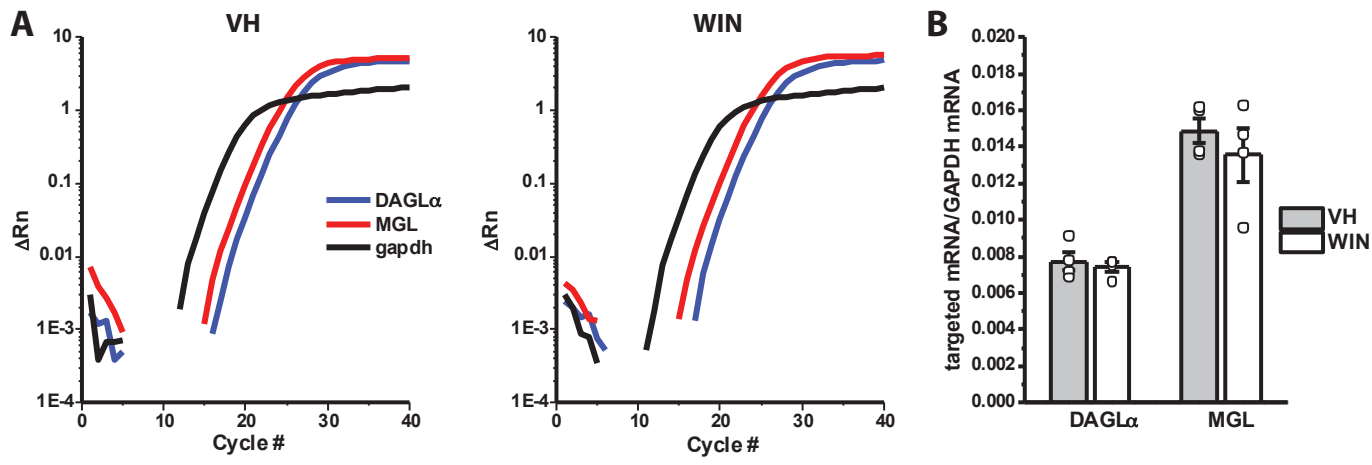

Supplement: NIHMS753664-supplement-7.pdf [file NIHMS753664-supplement-7.pdf]

**A**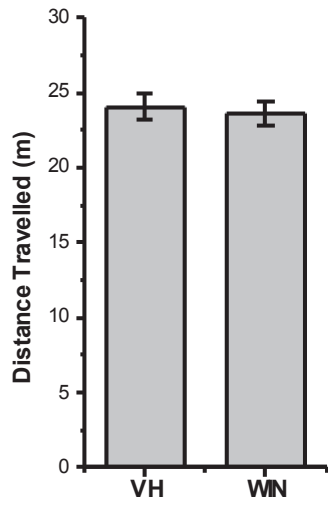**B**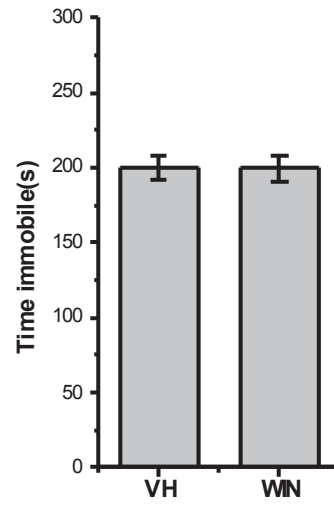

Supplement: NIHMS753664-supplement-8.pdf [file NIHMS753664-supplement-8.pdf]
